# Supplementary material
Source: Royal Society of Chemistry journal article supplement (doi:10.1039/d6em00034g)
Supplement: d6em00034g1.pdf [file d6em00034g1.pdf]

## Supplementary Information

### **Atmospheric reaction of methanethiol with hydroxyl radicals and chlorine atoms: implications for atmospheric sulfur cycle and HONO formation**

Teklebirhan Arefaine Gebru,<sup>a</sup> Narcisse Tsona Tchinda<sup>\*b</sup> and Lin Du<sup>\*abc</sup>

<sup>a</sup>School of Environmental Science and Engineering, Shandong University, Qingdao, 266237, China

<sup>b</sup>Qingdao Key Laboratory for Prevention and Control of Atmospheric Pollution in Coastal Cities, Environment Research Institute, Shandong University, Qingdao, 266237, China

<sup>c</sup>State Key Laboratory of Microbial Technology, Shandong University, Qingdao, 266237, China

\* Correspondence to: Narcisse Tsona Tchinda (tsonatch@sdu.edu.cn) and Lin Du (lindu@sdu.edu.cn)

## S1. Calculation details on the standard gas-phase concentration

The standard gas-phase concentration ( $c^0$ ) is calculated as follows, based on the ideal gas law:

$$PV = nRT \Rightarrow \frac{n}{V} = \frac{P^0}{RT} \quad (\text{S1})$$

$$N = nN_A \Rightarrow \frac{N}{V} = \frac{n}{V}N_A \quad (\text{S2})$$

$$c^0 = \frac{N}{V} \Rightarrow c^0 = \frac{P^0N_A}{RT} \quad (\text{S3})$$

where  $P^0$  is the standard atmospheric pressure ( $P^0 = 0.101325 \text{ J cm}^{-3}$ ),  $R$  is the universal gas constant ( $R = 8.314 \text{ J mol}^{-1} \text{ K}^{-1}$ ),  $T$  is the absolute temperature ( $T = 298 \text{ K}$ ),  $N_A$  is the Avogadro's number ( $N_A = 6.02214076 \times 10^{23} \text{ mol}^{-1}$ ),  $n$  is the number of moles of gas,  $V$  is the volume of gas, and  $N$  is the number of molecules of gas.

$$c^0 = \frac{0.101325 \text{ J cm}^{-3} \times 6.02214076 \times 10^{23} \text{ mol}^{-1}}{8.314 \text{ J mol}^{-1} \text{ K}^{-1} \times 298 \text{ K}} = 2.46 \times 10^{19} \text{ molecule cm}^{-3}$$

## S2. Wigner tunneling coefficient

The Wigner tunneling coefficient ( $\kappa$ ) is calculated as follows:

$$\kappa = 1 + \frac{1}{24} \left( \frac{hv^\pm}{k_B T} \right)^2 \quad (\text{S4})$$

where  $h$  is the Planck constant,  $v^\pm$  is the imaginary frequency of the transition state,  $k_B$  is the Boltzmann constant, and  $T$  is the absolute temperature.

### CH<sub>3</sub>SH + $\cdot\text{OH}/\text{Cl}\cdot$ reaction pathways

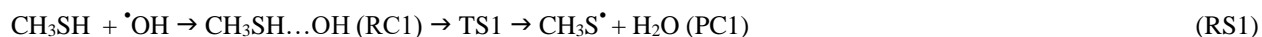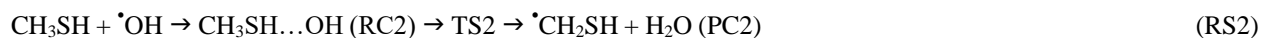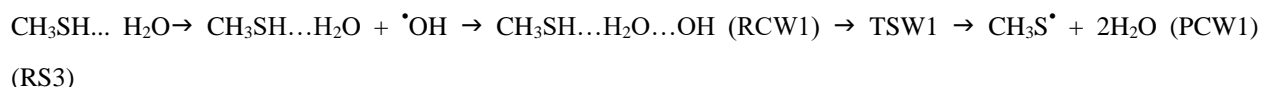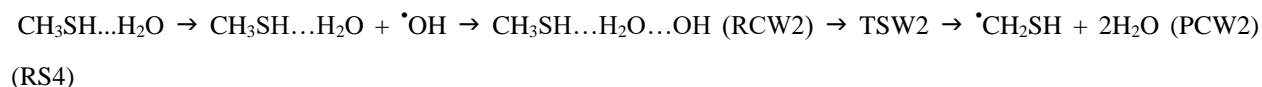

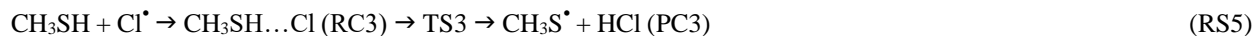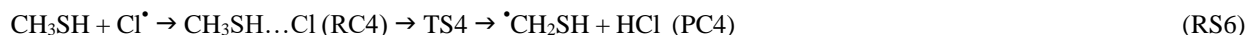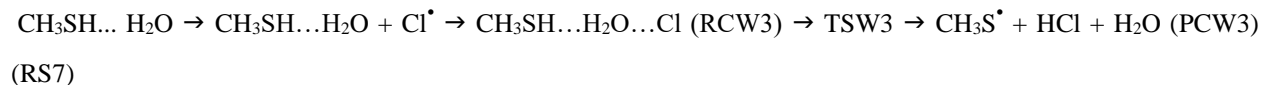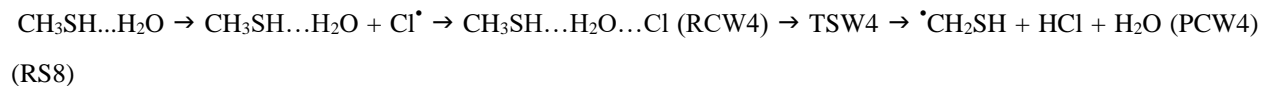

**Table S1. Electronic energies with zero-point energy correction ( $\Delta E+ZPE$ ), enthalpies ( $\Delta H$ ) and Gibbs free energies ( $\Delta G$ ) of relevant intermediate species involved in the  $\text{CH}_3\text{SH} + \text{OH}^\bullet$  reaction in the absence and presence of water, calculated relative to the energies of the separate reactants with the DLPNO-CCSD(T)/aug-cc-pVTZ//M06-2X/aug-cc-pV(T+d)Z method.  $\Delta G$  are calculated at 1 atm and 298 K. Energy units are kcal mol<sup>-1</sup>.**

| Species                                                           | $\Delta E$ | $\Delta E+ZPE$ | $\Delta H$ | $\Delta G$ |
|-------------------------------------------------------------------|------------|----------------|------------|------------|
| In the absence of water                                           |            |                |            |            |
| $\text{CH}_3\text{SH} + \text{OH}^\bullet$                        | 0.00       | 0              | 0          | 0          |
| RC1                                                               | -5.45      | -2.37          | 0.27       | 8.35       |
| TS1                                                               | -1.15      | -1.00          | -1.41      | 6.05       |
| PC1                                                               | -37.32     | -34.28         | -31.18     | -25.24     |
| RC2                                                               | -5.45      | -2.37          | 0.27       | 8.35       |
| TS2                                                               | 2.99       | 2.79           | 1.91       | 10.02      |
| PC2                                                               | -24.39     | -22.67         | -20.64     | -14.40     |
| In the presence of water                                          |            |                |            |            |
| $\text{CH}_3\text{SH} + \text{OH}^\bullet + \text{H}_2\text{O}$   | 0          | 0              | 0          | 0          |
| $\text{CH}_3\text{SH}\dots\text{H}_2\text{O} + \text{OH}^\bullet$ | -4.49      | -2.41          | -0.22      | 6.58       |

|      |        |        |        |        |
|------|--------|--------|--------|--------|
| RCW1 | -4.15  | -1.73  | -4.35  | 5.90   |
| TSW1 | -1.86  | -1.50  | -1.74  | 4.50   |
| PCW1 | -40.04 | -36.14 | -33.20 | -24.02 |
| RCW2 | -7.05  | -5.36  | -5.28  | 5.45   |
| TSW2 | 0.11   | -0.42  | -2.35  | 7.90   |
| PCW2 | -29.05 | -27.36 | -26.58 | -16.93 |

**Table S2. Electronic energies with zero-point energy correction ( $\Delta E+ZPE$ ), enthalpies ( $\Delta H$ ) and Gibbs free energies ( $\Delta G$ ) of relevant intermediate species involved in the  $\text{CH}_3\text{SH} + \text{Cl}^\bullet$  reaction in the absence and presence of water, calculated relative to the energies of the separate reactants with the DLPNO-CCSD(T)/aug-cc-pVTZ//M06-2X/aug-cc-pV(T+d)Z method.  $\Delta G$  are calculated at 1 atm and 298 K. Energy units are kcal mol<sup>-1</sup>.**

| Species                                                            | $\Delta E$ | $\Delta E+ZPE$ | $\Delta H$ | $\Delta G$ |
|--------------------------------------------------------------------|------------|----------------|------------|------------|
| $\text{CH}_3\text{SH} + \text{Cl}^\bullet$                         | 0          | 0              | 0          | 0          |
| RC3                                                                | -13.91     | -12.40         | -11.08     | -0.17      |
| TS3                                                                | -3.82      | -5.23          | -6.85      | 3.49       |
| PC3                                                                | -18.98     | -20.03         | -20.95     | -15.99     |
| RC4                                                                | -13.91     | -12.40         | -11.08     | 0.03       |
| TS4                                                                | 0.32       | -2.77          | -6.29      | 5.13       |
| PC4                                                                | -6.10      | -8.97          | -11.15     | -7.49      |
| $\text{CH}_3\text{SH} + \text{Cl}^\bullet + \text{H}_2\text{O}$    | 0          | 0              | 0          | 0          |
| $\text{CH}_3\text{SH}\cdots\text{H}_2\text{O} + \text{Cl}^\bullet$ | -4.49      | -2.41          | -0.22      | 6.58       |
| RCW3                                                               | -18.32     | -17.17         | -16.68     | -4.18      |
| TSW3                                                               | -5.06      | -6.85          | -9.27      | 2.78       |

|      |        |        |        |        |
|------|--------|--------|--------|--------|
| PCW3 | -19.38 | -20.25 | -21.16 | -15.01 |
| RCW4 | -1.34  | -0.51  | 0.11   | 9.87   |
| TSW4 | -0.16  | -3.56  | -7.66  | 3.89   |
| PCW4 | -6.24  | -9.46  | -12.52 | -6.25  |

**Table S3. Rate coefficients ( $\text{cm}^3 \text{molecule}^{-1} \text{s}^{-1}$ ),  $k_{R2}$ ,  $k_{R3}$ ,  $k_{R4}$ , and  $k_{R5}$ , of pathways R2, R3, R4, and R5, respectively, over the temperature range of 260-360 K.**

| T (K) | $k_{R2}$               | $k_{R3}$               | $k_{R4}$               | $k_{R5}$               |
|-------|------------------------|------------------------|------------------------|------------------------|
| 260   | $2.56 \times 10^{-11}$ | $1.23 \times 10^{-14}$ | $1.55 \times 10^{-9}$  | $1.62 \times 10^{-12}$ |
| 270   | $2.27 \times 10^{-11}$ | $1.41 \times 10^{-14}$ | $1.01 \times 10^{-9}$  | $1.36 \times 10^{-12}$ |
| 280   | $2.03 \times 10^{-11}$ | $1.61 \times 10^{-14}$ | $6.80 \times 10^{-10}$ | $1.16 \times 10^{-12}$ |
| 290   | $1.84 \times 10^{-11}$ | $1.82 \times 10^{-14}$ | $4.70 \times 10^{-10}$ | $9.96 \times 10^{-13}$ |
| 298   | $1.70 \times 10^{-11}$ | $2.00 \times 10^{-14}$ | $3.55 \times 10^{-10}$ | $8.88 \times 10^{-13}$ |
| 300   | $1.67 \times 10^{-11}$ | $2.04 \times 10^{-14}$ | $3.33 \times 10^{-10}$ | $8.67 \times 10^{-13}$ |
| 310   | $1.54 \times 10^{-11}$ | $2.27 \times 10^{-14}$ | $2.41 \times 10^{-10}$ | $7.63 \times 10^{-13}$ |
| 320   | $1.42 \times 10^{-11}$ | $2.52 \times 10^{-14}$ | $1.79 \times 10^{-10}$ | $6.76 \times 10^{-13}$ |
| 330   | $1.32 \times 10^{-11}$ | $2.78 \times 10^{-14}$ | $1.35 \times 10^{-10}$ | $6.04 \times 10^{-13}$ |
| 340   | $1.23 \times 10^{-11}$ | $3.04 \times 10^{-14}$ | $1.04 \times 10^{-10}$ | $5.43 \times 10^{-13}$ |
| 350   | $1.16 \times 10^{-11}$ | $3.33 \times 10^{-14}$ | $8.08 \times 10^{-11}$ | $4.93 \times 10^{-13}$ |
| 360   | $1.09 \times 10^{-11}$ | $3.62 \times 10^{-14}$ | $6.39 \times 10^{-11}$ | $4.51 \times 10^{-13}$ |

**Table S4. Computed branching ratios (%) for pathways R2, R3, R4, and R5, of the  $\text{CH}_3\text{SH} + \cdot\text{OH}$  reaction over the temperature range of 260-360 K.**

| T (K) | R2   | R3  | R4   | R5  |
|-------|------|-----|------|-----|
| 260   | 100  | 0   | 99.9 | 0.1 |
| 270   | 99.9 | 0.1 | 99.9 | 0.1 |
| 280   | 99.9 | 0.1 | 99.8 | 0.2 |
| 290   | 99.9 | 0.1 | 99.8 | 0.2 |
| 298   | 99.9 | 0.1 | 99.8 | 0.2 |
| 300   | 99.9 | 0.1 | 99.7 | 0.3 |
| 310   | 99.9 | 0.1 | 99.7 | 0.3 |
| 320   | 99.8 | 0.2 | 99.6 | 0.4 |
| 330   | 99.8 | 0.2 | 99.6 | 0.4 |
| 340   | 99.8 | 0.2 | 99.5 | 0.5 |
| 350   | 99.7 | 0.3 | 99.4 | 0.6 |
| 360   | 99.7 | 0.3 | 99.3 | 0.7 |

**Table S5. Effective rate coefficients ( $\text{cm}^3 \text{ molecule}^{-1} \text{ s}^{-1}$ ) for the monohydrated  $\text{CH}_3\text{SH} + \cdot\text{OH}$  reaction and the corresponding ratios relative to the bare reaction over 260-360 K.**

| T (K) | $k_{\text{eff,R4}}$    | $k_{\text{eff,R5}}$    | $k_{\text{eff,R4}} / k_{\text{R2}}$ | $k_{\text{eff,R5}} / k_{\text{R3}}$ |
|-------|------------------------|------------------------|-------------------------------------|-------------------------------------|
| 260   | $2.56 \times 10^{-11}$ | $1.23 \times 10^{-14}$ | 1.00                                | 1.00                                |
| 270   | $2.27 \times 10^{-11}$ | $1.41 \times 10^{-14}$ | 1.00                                | 1.00                                |
| 280   | $2.03 \times 10^{-11}$ | $1.61 \times 10^{-14}$ | 1.00                                | 1.00                                |
| 290   | $1.84 \times 10^{-11}$ | $1.82 \times 10^{-14}$ | 1.00                                | 1.00                                |
| 298   | $1.70 \times 10^{-11}$ | $2.00 \times 10^{-14}$ | 1.00                                | 1.00                                |
| 300   | $1.67 \times 10^{-11}$ | $2.04 \times 10^{-14}$ | 1.00                                | 1.00                                |
| 310   | $1.54 \times 10^{-11}$ | $2.27 \times 10^{-14}$ | 1.00                                | 1.00                                |
| 320   | $1.42 \times 10^{-11}$ | $2.52 \times 10^{-14}$ | 1.00                                | 1.00                                |
| 330   | $1.32 \times 10^{-11}$ | $2.78 \times 10^{-14}$ | 1.00                                | 1.00                                |
| 340   | $1.23 \times 10^{-11}$ | $3.04 \times 10^{-14}$ | 1.00                                | 1.00                                |
| 350   | $1.16 \times 10^{-11}$ | $3.33 \times 10^{-14}$ | 1.00                                | 1.00                                |
| 360   | $1.09 \times 10^{-11}$ | $3.62 \times 10^{-14}$ | 1.00                                | 1.00                                |

**Table S6. Rate coefficients ( $\text{cm}^3 \text{ molecule}^{-1} \text{ s}^{-1}$ ) for the  $\text{CH}_3\text{SH} + \text{Cl}^\cdot$  reaction, in the absence and presence of water, over the temperature range of 260-360 K.**

| T (K) | $k_{\text{R6}}$        | $k_{\text{R7}}$        | $k_{\text{R8}}$       | $k_{\text{R9}}$        |
|-------|------------------------|------------------------|-----------------------|------------------------|
| 260   | $1.63 \times 10^{-9}$  | $5.51 \times 10^{-11}$ | $9.93 \times 10^{-9}$ | $6.48 \times 10^{-10}$ |
| 270   | $1.28 \times 10^{-9}$  | $5.16 \times 10^{-11}$ | $6.53 \times 10^{-9}$ | $5.45 \times 10^{-10}$ |
| 280   | $1.02 \times 10^{-9}$  | $4.85 \times 10^{-11}$ | $4.43 \times 10^{-9}$ | $4.63 \times 10^{-10}$ |
| 290   | $8.28 \times 10^{-10}$ | $4.59 \times 10^{-11}$ | $3.10 \times 10^{-9}$ | $4.00 \times 10^{-10}$ |
| 298   | $7.05 \times 10^{-10}$ | $4.41 \times 10^{-11}$ | $2.35 \times 10^{-9}$ | $3.58 \times 10^{-10}$ |

|     |                        |                        |                        |                        |
|-----|------------------------|------------------------|------------------------|------------------------|
| 300 | $6.83 \times 10^{-10}$ | $4.37 \times 10^{-11}$ | $2.22 \times 10^{-9}$  | $3.50 \times 10^{-10}$ |
| 310 | $5.70 \times 10^{-10}$ | $4.17 \times 10^{-11}$ | $1.62 \times 10^{-9}$  | $3.08 \times 10^{-10}$ |
| 320 | $4.83 \times 10^{-10}$ | $4.00 \times 10^{-11}$ | $1.21 \times 10^{-9}$  | $2.73 \times 10^{-10}$ |
| 330 | $4.13 \times 10^{-10}$ | $3.85 \times 10^{-11}$ | $9.23 \times 10^{-10}$ | $2.45 \times 10^{-10}$ |
| 340 | $3.58 \times 10^{-10}$ | $3.71 \times 10^{-11}$ | $7.15 \times 10^{-10}$ | $2.21 \times 10^{-10}$ |
| 350 | $3.10 \times 10^{-10}$ | $3.59 \times 10^{-11}$ | $5.63 \times 10^{-10}$ | $2.01 \times 10^{-10}$ |
| 360 | $2.73 \times 10^{-10}$ | $3.49 \times 10^{-11}$ | $4.48 \times 10^{-10}$ | $1.84 \times 10^{-10}$ |

**Table S7. Computed branching ratios (%) for CH<sub>3</sub>SH + Cl<sup>•</sup> reaction in the absence and presence of water over the temperature range of 260-360 K.**

| T (K) | R6   | R7   | R8   | R9   |
|-------|------|------|------|------|
| 260   | 96.7 | 3.3  | 93.9 | 6.1  |
| 270   | 96.1 | 3.9  | 92.3 | 7.7  |
| 280   | 95.5 | 4.5  | 90.5 | 9.5  |
| 290   | 94.7 | 5.3  | 88.6 | 11.4 |
| 298   | 94.1 | 5.9  | 86.8 | 13.2 |
| 300   | 94.0 | 6.0  | 86.4 | 13.6 |
| 310   | 93.2 | 6.8  | 84.0 | 16.0 |
| 320   | 92.4 | 7.6  | 81.6 | 18.4 |
| 330   | 91.5 | 8.5  | 79.0 | 21.0 |
| 340   | 90.6 | 9.4  | 76.4 | 23.6 |
| 350   | 89.6 | 10.4 | 73.7 | 26.3 |
| 360   | 88.7 | 11.3 | 70.9 | 29.1 |

**Table S8. Effective rate coefficients ( $\text{cm}^3 \text{ molecule}^{-1} \text{ s}^{-1}$ ) for the monohydrated  $\text{CH}_3\text{SH} + \text{Cl}^\bullet$  reaction and the corresponding ratios relative to the bare reaction over 260-360 K.**

| T (K) | $k_{\text{eff,R8}}$    | $k_{\text{eff,R9}}$    | $k_{\text{eff,R8}}/k_{\text{R6}}$ | $k_{\text{eff,R9}}/k_{\text{R7}}$ |
|-------|------------------------|------------------------|-----------------------------------|-----------------------------------|
| 260   | $1.63 \times 10^{-9}$  | $5.51 \times 10^{-11}$ | 1.00                              | 1.00                              |
| 270   | $1.28 \times 10^{-9}$  | $5.16 \times 10^{-11}$ | 1.00                              | 1.00                              |
| 280   | $1.02 \times 10^{-9}$  | $4.85 \times 10^{-11}$ | 1.00                              | 1.00                              |
| 290   | $8.28 \times 10^{-10}$ | $4.59 \times 10^{-11}$ | 1.00                              | 1.00                              |
| 298   | $7.05 \times 10^{-10}$ | $4.41 \times 10^{-11}$ | 1.00                              | 1.00                              |
| 300   | $6.83 \times 10^{-10}$ | $4.37 \times 10^{-11}$ | 1.00                              | 1.00                              |
| 310   | $5.70 \times 10^{-10}$ | $4.17 \times 10^{-11}$ | 1.00                              | 1.00                              |
| 320   | $4.83 \times 10^{-10}$ | $4.00 \times 10^{-11}$ | 1.00                              | 1.00                              |
| 330   | $4.13 \times 10^{-10}$ | $3.85 \times 10^{-11}$ | 1.00                              | 1.00                              |
| 340   | $3.58 \times 10^{-10}$ | $3.71 \times 10^{-11}$ | 1.00                              | 1.00                              |
| 350   | $3.10 \times 10^{-10}$ | $3.59 \times 10^{-11}$ | 1.00                              | 1.00                              |
| 360   | $2.73 \times 10^{-10}$ | $3.49 \times 10^{-11}$ | 1.00                              | 1.00                              |

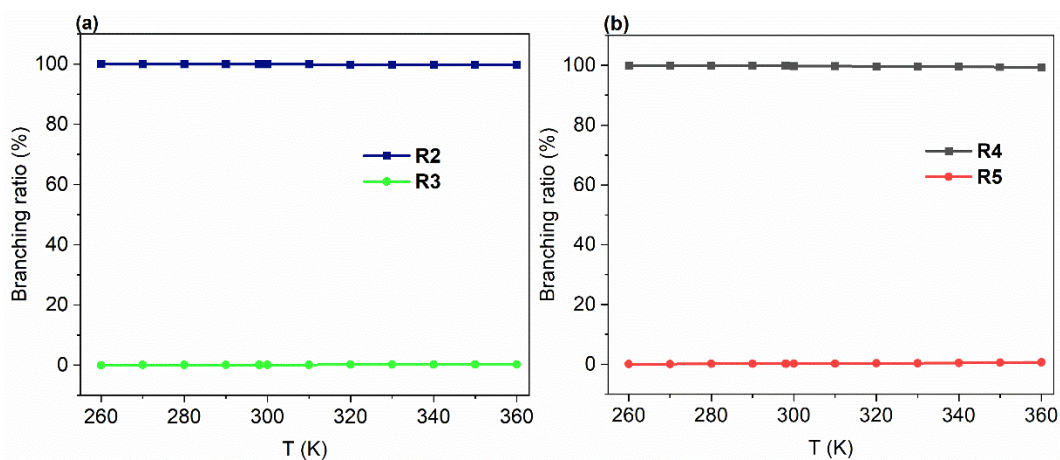

**Fig. S1** Computed branching ratios for  $\text{CH}_3\text{SH} + \bullet\text{OH}$  reaction (a) in the absence of water and (b) in the presence of water over the temperature range of 260-360 K.

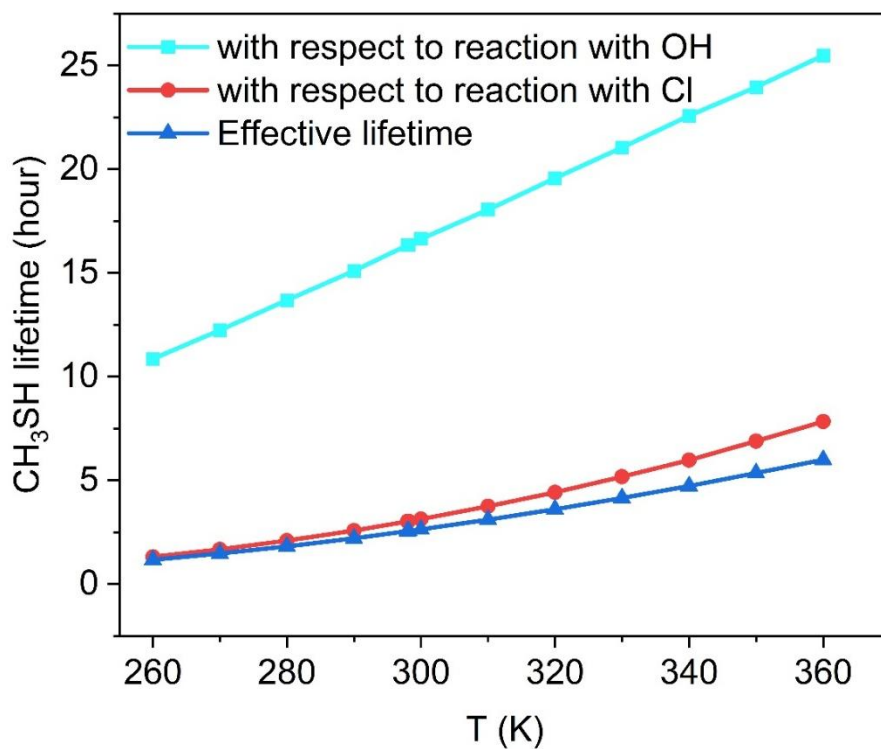

**Fig. S2** Lifetime of CH<sub>3</sub>SH with respect to its reactions with <sup>•</sup>OH and Cl<sup>•</sup>.

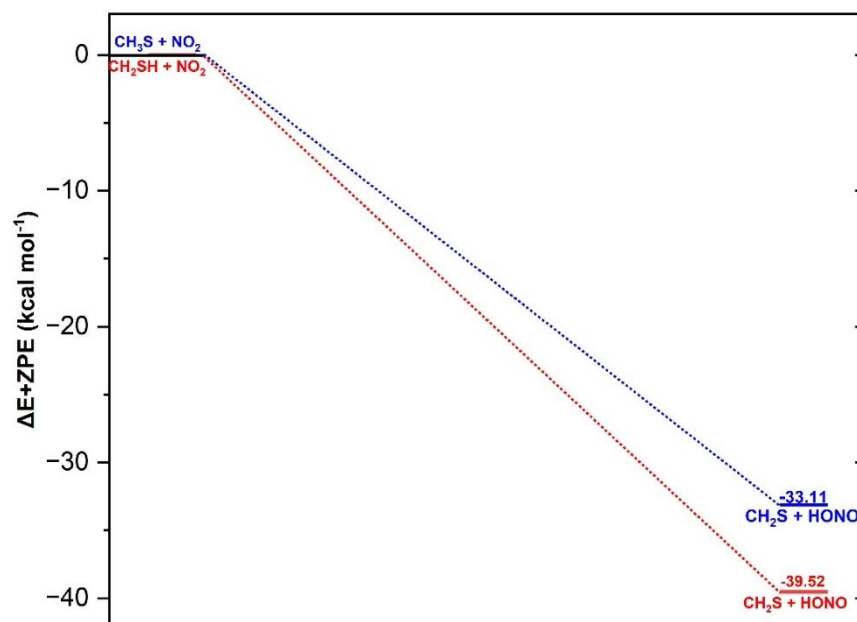

**Fig. S3** ZPE-corrected electronic energy profiles of the relevant species involved in CH<sub>3</sub>S<sup>•</sup> + NO<sub>2</sub> and <sup>•</sup>CH<sub>2</sub>SH + NO<sub>2</sub> reactions, calculated with the DLPNO-CCSD(T)/aug-cc-pVTZ//M06-2X/aug-cc-pV(T+d)Z method with respect to the initial reactants.

**Cartesian coordinates of reactants, pre-reactive complexes, transition states, and product complexes involved in the CH<sub>3</sub>SH + ·OH/Cl· reactions, calculated with the method M06-2X/aug-cc-pV(T+d)Z.**

**RC1**

|   |             |             |             |
|---|-------------|-------------|-------------|
| S | 0.26606500  | -0.72743100 | -0.07866900 |
| C | 1.12530700  | 0.85116200  | 0.00133000  |
| H | 2.11845200  | 0.72429900  | 0.42201400  |
| H | 0.52298100  | 1.54470500  | 0.57845600  |
| H | 1.20015500  | 1.20692900  | -1.02240300 |
| H | 0.13671800  | -0.92772800 | 1.23440800  |
| O | -1.59713100 | 0.50783100  | 0.05550700  |
| H | -2.21013000 | -0.07893400 | -0.40579900 |

**TS1**

|   |             |             |             |
|---|-------------|-------------|-------------|
| S | 0.57508600  | -0.73745800 | -0.00087800 |
| C | 1.17947500  | 0.96565400  | 0.00088200  |
| H | 1.64679900  | 1.18323700  | 0.95872300  |
| H | 0.34682300  | 1.64284800  | -0.16473100 |
| H | 1.91891000  | 1.08290900  | -0.78715300 |
| H | -0.78778000 | -0.38616800 | 0.01351900  |
| O | -2.07081600 | 0.34171000  | -0.00516900 |
| H | -2.83645300 | -0.25110300 | 0.02974400  |

**PC1**

|   |            |             |             |
|---|------------|-------------|-------------|
| S | 1.03593700 | -0.61509800 | -0.00004800 |
| C | 0.64783400 | 1.13088700  | 0.00077700  |

|   |             |             |             |
|---|-------------|-------------|-------------|
| H | 0.02249500  | 1.34347100  | 0.86882700  |
| H | 0.03214000  | 1.34536200  | -0.87378100 |
| H | 1.54030300  | 1.74853100  | 0.00571100  |
| H | -1.44187000 | -0.61377900 | -0.00160900 |
| O | -2.20475500 | -0.02211000 | -0.00224500 |
| H | -2.97702400 | -0.59045200 | 0.01491300  |

**RC2**

|   |             |             |             |
|---|-------------|-------------|-------------|
| S | -0.26605200 | -0.72743000 | -0.07866400 |
| C | -1.12532700 | 0.85114000  | 0.00132700  |
| H | -0.52301500 | 1.54469200  | 0.57844900  |
| H | -2.11846600 | 0.72425200  | 0.42202200  |
| H | -1.20020200 | 1.20690000  | -1.02240700 |
| H | -0.13660300 | -0.92764700 | 1.23441400  |
| O | 1.59712300  | 0.50784300  | 0.05550700  |
| H | 2.21008700  | -0.07890400 | -0.40587000 |

**TS2**

|   |             |             |             |
|---|-------------|-------------|-------------|
| S | -1.21718300 | -0.32947800 | -0.07555600 |
| C | -0.00312100 | 0.97799500  | 0.01745600  |
| H | 1.05958300  | 0.54195200  | 0.08585700  |
| H | -0.13875100 | 1.61828900  | 0.88416500  |
| H | -0.05200900 | 1.55387800  | -0.90208600 |
| H | -1.10195900 | -0.74514800 | 1.18974900  |
| O | 2.24600200  | -0.31241100 | 0.02430200  |
| H | 1.75876800  | -1.06600300 | -0.34793800 |

**PC2**

|   |             |             |             |
|---|-------------|-------------|-------------|
| S | -1.09826600 | -0.50761600 | -0.03162400 |
| C | -0.61063600 | 1.13341700  | 0.02194200  |

|   |             |             |             |
|---|-------------|-------------|-------------|
| H | 1.67944700  | 0.33782900  | -0.60049300 |
| H | 0.12753000  | 1.45847500  | 0.73712600  |
| H | -1.28596300 | 1.84635200  | -0.42174400 |
| H | -0.01431300 | -1.02207100 | 0.56238600  |
| O | 2.21182700  | -0.11875900 | 0.05919200  |
| H | 3.03474900  | -0.34915100 | -0.37647400 |

**RCW1**

|   |             |             |             |
|---|-------------|-------------|-------------|
| S | 0.36335500  | -0.51663400 | -0.23990600 |
| C | 0.06057100  | 1.25160300  | -0.08405000 |
| H | 0.77797500  | 1.65854300  | 0.62062200  |
| H | -0.96813800 | 1.42510500  | 0.21822700  |
| H | 0.23935300  | 1.67507500  | -1.06860100 |
| H | 0.19254500  | -0.84388500 | 1.04322200  |
| O | -2.89055500 | -0.09608000 | 0.18721800  |
| H | -3.74342400 | -0.52989300 | 0.11811900  |
| H | -2.26660600 | -0.66317700 | -0.27730500 |
| H | 2.91937100  | -0.78209300 | -0.15639000 |
| O | 2.47453200  | -0.05181400 | 0.29339600  |

**TSW1**

|   |             |             |             |
|---|-------------|-------------|-------------|
| S | -0.33676000 | 0.28352600  | 0.80109300  |
| C | 0.12558400  | 1.19252700  | -0.70174600 |
| H | -0.77404300 | 1.48668700  | -1.24821700 |
| H | 0.78785100  | 0.58703000  | -1.32534500 |
| H | 0.66267300  | 2.08662200  | -0.36857800 |
| H | -0.94947600 | -0.79117300 | 0.16202800  |
| O | 2.66156600  | -0.65068300 | -0.25409300 |
| H | 3.31096500  | -1.29266600 | 0.04721900  |

|   |             |             |             |
|---|-------------|-------------|-------------|
| H | 1.94023300  | -0.69775500 | 0.38728300  |
| H | -2.95999900 | -0.49775700 | 0.07680400  |
| O | -2.33450900 | -0.92088600 | -0.53818300 |

**PCW1**

|   |             |             |             |
|---|-------------|-------------|-------------|
| S | 1.26932000  | -0.28508700 | -0.63550700 |
| C | 1.28791900  | 0.39215400  | 1.02065900  |
| H | 1.04031700  | -0.36852400 | 1.75776000  |
| H | 0.49986500  | 1.14970800  | 1.03061000  |
| H | 2.24199500  | 0.86091500  | 1.24453100  |
| H | -0.79083300 | -1.34319200 | -0.08837700 |
| O | -1.44977900 | 1.47745000  | -0.19871500 |
| H | -2.09213100 | 1.91087700  | -0.76253300 |
| H | -1.79190300 | 0.58592900  | -0.03408400 |
| H | -2.16623700 | -2.04466900 | -0.02432400 |
| O | -1.67243500 | -1.29527200 | 0.31378700  |

**RCW2**

|   |             |             |             |
|---|-------------|-------------|-------------|
| S | -1.62757200 | 0.24179000  | -0.23793000 |
| C | -0.64589800 | -1.17913400 | 0.31869800  |
| H | -1.29113700 | -1.97510600 | 0.67693500  |
| H | 0.06463000  | -0.88780800 | 1.08804500  |
| H | -0.09490500 | -1.52879000 | -0.55148700 |
| H | -2.16495700 | 0.55208100  | 0.94570700  |
| O | 1.34516200  | 1.52407300  | 0.22028500  |
| H | 1.66066300  | 2.31868900  | -0.21515600 |
| H | 0.40261300  | 1.44998200  | 0.00438300  |
| H | 2.11224800  | -0.14377600 | -0.07510500 |
| O | 2.30826200  | -1.09646200 | -0.21761400 |

**TSW2**

|   |             |             |             |
|---|-------------|-------------|-------------|
| S | -1.40297800 | -0.59307800 | -0.13612800 |
| C | -0.90380000 | 1.00621900  | 0.48378400  |
| H | -1.54954200 | 1.80939100  | 0.14118500  |
| H | 0.17675400  | 1.28768200  | 0.11023300  |
| H | -0.87378800 | 0.96028300  | 1.56827100  |
| H | -1.32337800 | -0.29504000 | -1.43721800 |
| O | 1.86307600  | -1.26469800 | 0.08961700  |
| H | 2.18529700  | -1.71191200 | 0.87481900  |
| H | 0.91334000  | -1.44075600 | 0.04592500  |
| H | 1.79598000  | 0.63469100  | -0.17586000 |
| O | 1.45514800  | 1.54064700  | -0.32111800 |

**PCW2**

|   |             |             |             |
|---|-------------|-------------|-------------|
| S | -1.48609800 | 0.17273100  | -0.47903600 |
| C | -1.02531500 | -0.44727200 | 1.04883700  |
| H | -0.33816300 | 0.11676300  | 1.66002300  |
| H | 2.28487900  | 1.94874700  | 0.33904300  |
| H | -1.68133200 | -1.17880700 | 1.49240500  |
| H | -0.49109300 | 1.06643700  | -0.58522900 |
| O | 1.72835400  | -1.35704600 | -0.22211300 |
| H | 1.59239200  | -1.64260000 | -1.12887600 |
| H | 0.85639200  | -1.41858600 | 0.19420800  |
| H | 1.81696300  | 0.51376000  | -0.00504300 |
| O | 1.50782300  | 1.42132400  | 0.14774000  |

**RC3**

|   |            |             |             |
|---|------------|-------------|-------------|
| S | 0.80595200 | -0.70863900 | -0.08785600 |
| C | 1.47848500 | 0.95939400  | 0.02096200  |

|    |             |             |             |
|----|-------------|-------------|-------------|
| H  | 2.49487800  | 0.92867400  | 0.40340700  |
| H  | 0.83073900  | 1.56577100  | 0.64547600  |
| H  | 1.47418600  | 1.35110000  | -0.99235500 |
| H  | 0.70906000  | -0.94935900 | 1.22329500  |
| Cl | -1.60441300 | 0.15798100  | 0.00000600  |

**TS3**

|    |             |             |             |
|----|-------------|-------------|-------------|
| S  | 0.97993500  | -0.72615900 | -0.02305000 |
| C  | 1.52595000  | 0.98783800  | 0.00845100  |
| H  | 1.38049800  | 1.42288700  | 0.99200000  |
| H  | 0.97135500  | 1.54920300  | -0.73924100 |
| H  | 2.58146000  | 0.98977200  | -0.25570800 |
| H  | -0.32406400 | -0.48819800 | 0.60284500  |
| Cl | -1.73199500 | 0.13046200  | -0.01657700 |

**PC3**

|    |             |             |             |
|----|-------------|-------------|-------------|
| S  | 1.46495800  | -0.67248300 | -0.00117600 |
| C  | 1.40531100  | 1.11531400  | -0.00394300 |
| H  | 0.99464100  | 1.42949600  | 0.95819100  |
| H  | 0.70762800  | 1.45376000  | -0.77012600 |
| H  | 2.38642200  | 1.55644400  | -0.14851300 |
| H  | -0.86081800 | -0.47701600 | 0.01092900  |
| Cl | -2.06465100 | 0.00618600  | -0.00047100 |

**RC4**

|   |             |             |             |
|---|-------------|-------------|-------------|
| S | -2.23574400 | -0.15131900 | -0.10320300 |
| C | -0.55184700 | 0.47469500  | 0.07217000  |
| H | 0.12491900  | -0.34529900 | 0.33653500  |
| H | -0.48376200 | 1.26046700  | 0.81806300  |
| H | -0.26387000 | 0.87482500  | -0.89620300 |

|    |             |             |             |
|----|-------------|-------------|-------------|
| H  | -2.40571000 | -0.51906300 | 1.17005100  |
| Cl | 2.47714200  | -0.09988200 | -0.01236600 |

**TS4**

|    |             |             |             |
|----|-------------|-------------|-------------|
| S  | -1.80452100 | -0.32382200 | -0.09043800 |
| C  | -0.59089500 | 0.91254000  | 0.04728400  |
| H  | 0.55494700  | 0.37538500  | -0.00717400 |
| H  | -0.55572800 | 1.43916700  | 0.99443400  |
| H  | -0.59736600 | 1.56633100  | -0.81827000 |
| H  | -1.73301000 | -0.77434500 | 1.16708000  |
| Cl | 2.04405100  | -0.17062500 | -0.01016300 |

**PC4**

|    |             |             |             |
|----|-------------|-------------|-------------|
| S  | -1.82342400 | -0.43366900 | -0.08747500 |
| C  | -1.01600000 | 1.06848200  | 0.04352500  |
| H  | 1.01697700  | 0.33171300  | -0.09415400 |
| H  | -0.85382300 | 1.52242000  | 1.00773700  |
| H  | -1.02605200 | 1.68649200  | -0.84029900 |
| H  | -1.65505900 | -0.83841800 | 1.17600100  |
| Cl | 2.22286600  | -0.12790600 | -0.00652000 |

**RCW3**

|   |             |             |             |
|---|-------------|-------------|-------------|
| S | 1.09748900  | -0.24929000 | -0.67368000 |
| C | 1.53817100  | 0.35765200  | 0.96439200  |
| H | 0.67888100  | 0.86195000  | 1.39380000  |
| H | 2.38787700  | 1.03065800  | 0.88492900  |
| H | 1.80044300  | -0.51304000 | 1.55820100  |
| H | 0.42783200  | 0.84402900  | -1.06856200 |
| O | -1.13108300 | 1.98498600  | -0.07966000 |
| H | -1.51626200 | 1.10975700  | 0.07842400  |

|    |             |             |             |
|----|-------------|-------------|-------------|
| H  | -1.86772100 | 2.58840200  | -0.19224700 |
| Cl | -1.15595500 | -1.17405400 | 0.17501600  |

**TSW3**

|    |             |             |             |
|----|-------------|-------------|-------------|
| S  | 1.35374100  | -0.56606700 | -0.48939200 |
| C  | 1.52754200  | 0.68284600  | 0.78584900  |
| H  | 1.16607900  | 1.63962300  | 0.42181000  |
| H  | 2.57482800  | 0.71780600  | 1.07348100  |
| H  | 0.93146900  | 0.36947100  | 1.64220800  |
| H  | -0.10030700 | -0.45733800 | -0.65115200 |
| O  | -1.03325400 | 2.12375100  | -0.25236200 |
| H  | -1.48487400 | 1.30123100  | -0.02488500 |
| H  | -1.66456300 | 2.63288200  | -0.76435100 |
| Cl | -1.41068900 | -1.07256900 | 0.20217500  |

**PCW3**

|    |             |             |             |
|----|-------------|-------------|-------------|
| S  | 1.36221100  | -0.49661600 | -0.69797600 |
| C  | 1.57522500  | -0.41774500 | 1.07608700  |
| H  | 1.33652200  | 0.61154300  | 1.35255300  |
| H  | 2.60345000  | -0.63301500 | 1.35336400  |
| H  | 0.88248800  | -1.08481300 | 1.58489000  |
| H  | -0.76775500 | -0.65969600 | -0.39744400 |
| O  | -0.02816000 | 2.11094800  | 0.03234800  |
| H  | -0.88417400 | 1.66915300  | 0.07320100  |
| H  | -0.16070700 | 2.88767700  | -0.51510500 |
| Cl | -2.00184000 | -0.54271200 | 0.05887300  |

**RCW4**

|   |             |             |             |
|---|-------------|-------------|-------------|
| S | -1.32780600 | -1.29802000 | -0.08136000 |
| C | -0.07269200 | 0.00211100  | 0.02230200  |

|    |             |             |             |
|----|-------------|-------------|-------------|
| H  | -0.48924100 | 0.92740700  | 0.40961400  |
| H  | 0.75669400  | -0.33564000 | 0.64733200  |
| H  | 0.27970000  | 0.16607900  | -0.99309200 |
| H  | -1.60183800 | -1.36814800 | 1.22546100  |
| O  | -2.82976500 | 1.63973900  | 0.02894400  |
| H  | -3.73103300 | 1.92664400  | -0.12864600 |
| H  | -2.80875400 | 0.69947500  | -0.18637900 |
| Cl | 3.05374400  | 0.33070200  | -0.00222800 |

#### **Tsw4**

|    |             |             |             |
|----|-------------|-------------|-------------|
| S  | 1.85284100  | -0.23041000 | -0.35046100 |
| C  | 0.72384800  | -0.56038600 | 0.91744700  |
| H  | 0.85209300  | -1.50352500 | 1.43663800  |
| H  | -0.43724000 | -0.68511800 | 0.39908100  |
| H  | 0.59509300  | 0.30275600  | 1.56324800  |
| H  | 2.06871800  | -1.49991100 | -0.71453600 |
| O  | -0.32633800 | 2.21546200  | 0.11329800  |
| H  | -0.76709900 | 2.80650600  | -0.49995800 |
| H  | -0.79378300 | 1.37592800  | 0.02919000  |
| Cl | -1.93503600 | -0.67479200 | -0.17749200 |

#### **PCW4**

|   |             |             |             |
|---|-------------|-------------|-------------|
| S | 1.78557900  | -0.29517400 | -0.45349900 |
| C | 1.02443600  | -0.57244100 | 1.05312000  |
| H | 1.21183700  | -1.48686000 | 1.59231100  |
| H | -0.89650200 | -0.72671600 | 0.35018400  |
| H | 0.71115300  | 0.31797700  | 1.57566200  |
| H | 2.20253500  | -1.54751000 | -0.66995600 |
| O | -0.17288000 | 2.13638400  | 0.16240200  |

|    |             |             |             |
|----|-------------|-------------|-------------|
| H  | 0.01560500  | 2.76781400  | -0.53482300 |
| H  | -0.95155400 | 1.65116200  | -0.13215700 |
| Cl | -2.09564200 | -0.58291200 | -0.14959900 |

**Cartesian coordinates of reactants, pre-reactive complexes, transition states, and product complexes involved in the  $\text{CH}_3\text{S}^\bullet + \text{O}_2/\text{NO}_2$  and  $^\bullet\text{CH}_2\text{SH} + \text{O}_2/\text{NO}_2$  reactions, calculated with the method M06-2X/aug-cc-pV(T+d)Z.**

**RC5**

|   |             |             |             |
|---|-------------|-------------|-------------|
| S | -0.39444300 | -0.65071500 | -0.00010400 |
| C | -1.75390600 | 0.51684700  | 0.00024700  |
| H | -2.65894800 | -0.10409400 | 0.00078100  |
| H | -1.74302300 | 1.13211500  | -0.90442900 |
| H | -1.74223300 | 1.13250500  | 0.90464900  |
| O | 0.84593100  | 0.57537900  | -0.00056900 |
| O | 2.02641000  | 0.06835000  | 0.00046600  |

**TS5**

|   |             |             |             |
|---|-------------|-------------|-------------|
| S | 0.10289900  | -0.42380600 | -0.46520400 |
| C | 1.54023300  | 0.32836300  | 0.29895000  |
| H | 2.16309600  | 0.75772700  | -0.49417500 |
| H | 2.09963900  | -0.42998100 | 0.85632300  |
| H | 1.15709100  | 1.11125300  | 0.96004700  |
| O | -0.93772100 | -0.49651600 | 0.71051100  |
| O | -1.10072900 | 0.91798000  | -0.16959100 |

**PC5**

|   |             |             |             |
|---|-------------|-------------|-------------|
| S | 0.20220800  | 0.00000200  | -0.27223900 |
| C | -1.56935200 | -0.00001300 | 0.09682400  |

|   |             |             |             |
|---|-------------|-------------|-------------|
| H | -1.99086200 | 0.90962000  | -0.33776100 |
| H | -1.64667700 | 0.00004700  | 1.18960100  |
| H | -1.99082300 | -0.90969500 | -0.33769100 |
| O | 0.73808300  | -1.28092400 | 0.20379600  |
| O | 0.73806100  | 1.28093400  | 0.20379500  |

### **RC6**

|   |             |             |             |
|---|-------------|-------------|-------------|
| S | -1.30350600 | -0.60400100 | -0.00304700 |
| C | -0.96844100 | 1.15344800  | 0.00489300  |
| H | -0.41060600 | 1.45624700  | -0.87845100 |
| H | -0.44962200 | 1.45825200  | 0.91088200  |
| H | -1.94004200 | 1.65232500  | -0.01839400 |
| O | 2.05848400  | 0.44031800  | -0.00883900 |
| O | 1.62489300  | -0.66825500 | 0.00950900  |

### **TS6**

|   |             |             |             |
|---|-------------|-------------|-------------|
| S | -0.93045800 | -0.59301700 | -0.00000600 |
| C | -0.93476600 | 1.05430800  | 0.00001500  |
| H | 0.50091300  | 1.06814200  | -0.00012500 |
| H | -1.13444500 | 1.59086000  | 0.92209700  |
| H | -1.13457600 | 1.59089500  | -0.92201800 |
| O | 1.56547000  | 0.53295500  | -0.00000800 |
| O | 1.21753300  | -0.66888900 | 0.00001400  |

### **PC6**

|   |             |             |             |
|---|-------------|-------------|-------------|
| S | -1.15980500 | -0.62150500 | -0.00234900 |
| C | -1.46578100 | 0.94906200  | 0.00313600  |
| H | 0.93355800  | 0.95555800  | -0.00232400 |
| H | -1.59150300 | 1.50915700  | 0.92731100  |

|   |             |             |             |
|---|-------------|-------------|-------------|
| H | -1.57256300 | 1.51907400  | -0.91742500 |
| O | 1.87003700  | 0.66781200  | -0.00361800 |
| O | 1.82772200  | -0.63457200 | 0.00502000  |

**RC7**

|   |             |             |             |
|---|-------------|-------------|-------------|
| S | 0.99489400  | -0.29698400 | -0.01443600 |
| C | 2.58020300  | 0.34619600  | -0.00619400 |
| H | 3.38817600  | -0.35092600 | -0.14505200 |
| H | 2.77052700  | 1.37852900  | 0.22669300  |
| H | 0.32818300  | 0.84704900  | 0.16625600  |
| O | -2.18496200 | -0.51241400 | 0.06360600  |
| O | -2.55084000 | 0.61240300  | -0.06107500 |

**TS7**

|   |             |             |             |
|---|-------------|-------------|-------------|
| S | 0.65706800  | -0.44700000 | -0.24502100 |
| C | 1.82514400  | 0.53532400  | 0.23548700  |
| H | 2.72585000  | 0.10718600  | 0.65170000  |
| H | 1.70173400  | 1.60940600  | 0.25711700  |
| H | -0.33634300 | 0.41548600  | -0.84092100 |
| O | -1.78397800 | 0.50330600  | -0.31490100 |
| O | -1.41042100 | -0.27730900 | 0.61984100  |

**PC7**

|   |             |             |             |
|---|-------------|-------------|-------------|
| S | -1.36732700 | -0.51463000 | -0.00028200 |
| C | -1.10150000 | 1.06138900  | 0.00051500  |
| H | -1.92020200 | 1.77517500  | 0.00114300  |
| H | -0.09457600 | 1.47776100  | 0.00055900  |
| H | 0.77817800  | -0.82713400 | -0.00116000 |
| O | 1.76596300  | -0.70869300 | 0.00092600  |

O 1.94939000 0.63868500 -0.00081500

**CH<sub>3</sub>S<sup>\*</sup> + NO<sub>2</sub> Reactants**

S 0.17014169 -0.03211846 -0.02785060

C 1.70621499 0.90939840 -0.03384760

H 1.98675519 1.07018001 1.01449240

H 1.57761675 1.88755617 -0.50160460

H 2.51474586 0.35613010 -0.51637560

N 7.23699774 0.66106758 -0.01361410

O 6.04492546 0.52337311 -0.01163628

O 8.16173457 -0.10369492 -0.01328072

**CH<sub>3</sub>S<sup>\*</sup> + NO<sub>2</sub> Products**

S 1.77891500 -0.68622300 -0.00264100

C 2.11259000 0.87807100 0.00668700

H -0.49813800 0.04745300 -0.00824800

H 3.13591400 1.24265700 0.01364100

H 1.33042600 1.63410000 0.00629500

N -2.37840300 0.36841500 0.00098500

O -1.09985100 0.82866600 -0.00818500

O -2.45734500 -0.80266300 0.00612800

**\*CH<sub>2</sub>SH + NO<sub>2</sub> Reactants**

S 2.31743200 1.32085902 0.38509446

C 0.59117115 0.91260660 0.06987301

H 0.46167181 0.43147017 -0.90165383

H -0.05112669 1.79204892 0.15170182

N 7.72400804 -0.18422314 -0.11387250

O 8.83982349 0.25731051 -0.11189468

|   |            |            |             |
|---|------------|------------|-------------|
| O | 6.63284576 | 0.31514121 | -0.11353912 |
| H | 3.24428164 | 1.41527310 | 0.11502832  |

**\*CH<sub>2</sub>SH + NO<sub>2</sub> Products**

|   |             |             |             |
|---|-------------|-------------|-------------|
| S | 1.94047100  | -0.44521600 | 0.00003800  |
| C | 1.68870900  | 1.13500700  | 0.00040300  |
| H | 2.51741100  | 1.83737800  | 0.00032600  |
| H | 0.68724700  | 1.55661100  | 0.00063800  |
| H | -0.32335900 | -1.01135200 | 0.00012200  |
| N | -1.62647900 | 0.31438700  | -0.00039600 |
| O | -1.30188100 | -1.01316600 | 0.00016100  |
| O | -2.78258700 | 0.47942400  | -0.00032900 |
